# Supplementary material for: Study of routine metabolism and acute toxicity of mycogenic silver nanoparticles on Palaemon pandaliformis (shrimp)
Source: Royal Society of Chemistry journal article supplement (doi:10.1039/d2en00726f), 2023-01-01
Supplement: d2en00726f1.pdf [file d2en00726f1.pdf]

**Table S1. Mean value of changes present in the gills of shrimps exposed to AgNP-AT and AgNO<sub>3</sub>.**

| Aspects of histological analysis<br>(AVA) | Control   |    | AgNP-AT (μM) |      |      |      |      |    | AgNO <sub>3</sub> (μM) |      |      |      |      |    |
|-------------------------------------------|-----------|----|--------------|------|------|------|------|----|------------------------|------|------|------|------|----|
|                                           | Untreated |    | 0.5          |      | 1    |      | 10   |    | 0.01                   |      | 0.05 |      | 0,1  |    |
|                                           | 24        | 96 | 24           | 96   | 24   | 96   | 24   | 96 | 24                     | 96   | 24   | 96   | 24   | 96 |
| Epithelial rupture                        | 0         | 0  | 50           | 9.1  | 33.3 | 66.6 | 27   | 60 | 0                      | 0    | 0    | 85   | 0    | 20 |
| Partial lamellae fusion                   | 0         | 10 | 5.5          | 4.5  | 0    | 0    | 13.3 | 20 | 0                      | 10   |      | 92.3 | 0    | 32 |
| Complete fusion of some lamellae          | 0         | 0  | 0            | 0    | 0    | 0    | 0    | 0  | 0                      | 0    | 0    | 0    | 0    | 0  |
| Complete fusion of all lamellae           | 0         | 0  | 0            | 0    | 0    | 0    | 0    | 0  | 0                      | 0    | 0    | 0    | 0    | 0  |
| Hemocytic infiltration                    | 0         | 0  | 72.2         | 100  | 83.3 | 100  | 86.7 | 80 | 0                      | 0    | 9.1  | 100  | 85.7 | 96 |
| Lifting of the lamellar cuticle           | 0         | 0  | 50           | 100  | 83.3 | 100  | 86.7 | 80 | 0                      | 0    | 0    | 100  | 42.9 | 96 |
| Disarray of the capillaries               | 0         | 0  | 27.8         | 40.9 | 50   | 33.3 | 33.3 | 80 | 0                      | 0    | 0    | 30.8 | 57.1 | 28 |
| Clavate-globate “clubbing”                | 0         | 0  |              | 0    | 0    | 22.2 | 70   | 80 | 0                      | 0    | 0    |      | 57.1 | 0  |
| Edema                                     | 0         | 0  | 50           | 9.1  | 33.3 | 66.6 | 26.7 | 60 | 0                      | 0    | 0    | 84.6 | 0    | 20 |
| Lamellar aneurysm                         | 0         | 0  | 0            | 0    | 0    | 0    | 0    | 0  | 0                      | 0    | 0    | 0    | 0    | 0  |
| Fibrosis                                  | 0         | 0  | 0            | 0    | 0    | 0    | 0    | 0  | 0                      | 0    | 0    | 0    | 0    | 0  |
| Necrosis                                  | 0         | 0  | 0            | 0    | 0    | 0    | 0    | 0  | 0                      | 0    | 0    | 0    | 0    | 0  |
| Presence of parasites                     | 4.5       | 0  | 72.2         | 36.4 | 66.6 | 33.3 | 86.7 | 40 | 9.1                    | 30.8 | 85.7 | 76   | 15   | 40 |

Average Value Alteration (AVA) based on the occurrence of injuries, for which numerical values were assigned as stage **I** – discrete (1-25 %), **II** – moderate (25-50 %), **III** – intense (50-75 %) and **IV** – severe (75-100 %).

| Aspects of histological analysis<br>(AVA) | Control   |    | AgNP-AT ( $\mu\text{M}$ ) |     |     |     | AgNO <sub>3</sub> ( $\mu\text{M}$ ) |     |      |      |      |     |     |      |
|-------------------------------------------|-----------|----|---------------------------|-----|-----|-----|-------------------------------------|-----|------|------|------|-----|-----|------|
|                                           | Untreated |    | 0.5                       |     | 1   |     | 10                                  |     | 0.01 |      | 0.05 |     | 1   |      |
|                                           | 24        | 96 | 24                        | 96  | 24  | 96  | 24                                  | 96  | 24   | 96   | 24   | 96  | 24  | 96   |
| Nuclear Vacuolization                     | 0         | 0  | 0                         | 0   | 0   | 0   | 42                                  | 42  | 77   | 88.7 | 48   | 48  | 77  | 88.7 |
| Cellular vacuolization                    | 25        | 20 | 100                       | 100 | 100 | 100 | 100                                 | 100 | 100  | 100  | 100  | 100 | 100 | 100  |
| Basal lamina displacement                 | 0         | 0  | 0                         | 0   | 0   | 0   | 0                                   | 0   | 0    | 0    | 0    | 0   | 0   | 0    |
| Irregular or abnormal tubular appearance  | 10        | 10 | 100                       | 100 | 100 | 100 | 100                                 | 100 | 100  | 100  | 100  | 100 | 100 | 100  |
| Hemocytic infiltrations                   | 60        | 70 | 100                       | 100 | 100 | 100 | 100                                 | 100 | 100  | 100  | 100  | 100 | 100 | 100  |
| Cell disruption                           | 0         | 0  | 30                        | 25  | 50  | 50  | 78                                  | 100 | 23   | 33.3 | 25   | 25  | 23  | 33.3 |
| Necrosis                                  | 0         | 0  | 0                         | 0   | 0   | 0   | 0                                   | 0   | 0    | 0    | 0    | 0   | 0   | 0    |

**Table S2. Average Value Alteration (AVA) present in the hepatopancreatic organs of shrimp exposed to AgNP-AT and AgNO<sub>3</sub>.**

Average Value Alteration (AVA) based on the occurrence of injuries, for which numerical values were assigned as stage: **I** - discrete (1-25 %), **II** – moderate (25-50 %), **III** – intense (50-75 %) and **IV** – severe (75-100 %).

**Table S3. Histological Alteration Index (HAI) in gills and hepatopancreatic tissue of shrimp exposed to AgNP-AT and AgNO<sub>3</sub> for 24 and 96 h.**

|                              |      | HAI Classification |      |                |      |
|------------------------------|------|--------------------|------|----------------|------|
|                              |      | Gills              |      | Hepatopancreas |      |
|                              |      | 24 h               | 96 h | 24 h           | 96 h |
| <b>Untreated</b>             |      | 1                  | 1    | 3              | 3    |
| <b>AgNP-AT (μM)</b>          | 0.5  | 35                 | 35   | 24             | 24   |
|                              | 1    | 34                 | 35   | 25             | 25   |
|                              | 10   | 36                 | 36   | 26             | 26   |
| <b>AgNO<sub>3</sub> (μM)</b> | 0.01 | 3                  | 35   | 14             | 14   |
|                              | 0.05 | 15                 | 35   | 25             | 25   |
|                              | 0.1  | 36                 | 36   | 25             | 24   |

\*HAI from 0-10: functionally normal organ; HAI from 11-20: organ with mild to moderate changes; HAI 21-50: organ with moderate to severe changes; 51-100: organ with severe alterations.
